# Supplementary material
Source: publisher figshare collection journal article supplement (https://tandf.figshare.com/ndownloader/files/26654294)
Supplement: Supplementary file 1 [file 26654294]

| Cancer type | **Patients, n(%)** |
| --- | --- |
| - Breast | 43(38) |
| - Gastrointestinal | 17(15) |
| - Pulmonary | 15(13) |
| - Prostate | 8(7) |
| - Gynecological | 6(5) |
| - Endocrine | 4(4) |
| - Central nervous system | 4(4) |
| - Urinary tract | 3(3) |
| - Head and neck | 3(3) |
| - Melanoma | 3(3) |
| - Sarcoma | 2(2) |
| - Testis | 2(2) |
| - Unknown primary | 2(2) |

**Supplementary Table 1. Specific cancer types of patients infected with SARS-CoV-2**
